# Supplementary material for: Exploring the thermal decomposition and detonation mechanisms of 2,4-dinitroanisole by TG-FTIR-MS and molecular simulations
Source: Royal Society of Chemistry journal article supplement (doi:10.1039/d4ra00860j), 2024-01-01
Supplement: d4ra00860j1.pdf [file d4ra00860j1.pdf]

1  
2  
3  
4  
5  
6  
7  
8  
9  
10  
11  
12  
13  
14  
15  
16  
17  
18  
19  
20  
21  
22

Support Information for:

**Exploring the thermal decomposition and detonation mechanisms of  
2,4-dinitroanisole by TG-FTIR-MS and molecular simulations**

Nian Yang<sup>a</sup>, Tianlong Wu<sup>a</sup>, Xiaofang Bao<sup>a</sup>, Teng Ma<sup>a</sup>, Yinsheng Huang<sup>a</sup>, Dabin Liu<sup>a</sup>, Xuedong  
Gong<sup>a</sup>, Yan A. Wang<sup>b</sup>, Sen Xu<sup>a,\*</sup>, Baojing Zhou<sup>a,\*</sup>

<sup>a</sup> School of Chemistry and Chemical Engineering, Nanjing University of Science & Technology,  
Nanjing 210094, China

<sup>b</sup> Department of Chemistry, University of British Columbia, Vancouver, British Columbia V6T  
1Z1, Canada

**Contents**

- 1. Validation of the ReaxFF/lg description**
- 2. Detonation of DNAN and TNT during fast heating**
- 3. Detonation of DNAN during slow heating**
- 4. Key reactions of DNAN and TNT during thermal decomposition  
and detonation**

23 **1. Validation of the ReaxFF/lg description**

24 **Table S1** Experiment and computed lattice parameters of DNAN and TNT. The data  
 25 outside and in the parenthesis are for DNAN and TNT, respectively.

| Parameters                         | Exp           | Reaxff-lg     | Deviation/%   |
|------------------------------------|---------------|---------------|---------------|
| a/Å                                | 8.77 (14.91)  | 8.66 (14.82)  | -1.26 (-0.60) |
| b/Å                                | 12.65 (6.03)  | 12.48 (6.00)  | -1.27 (-0.50) |
| c/Å                                | 15.43 (19.68) | 15.23 (19.57) | -1.27 (-0.56) |
| $\beta/^\circ$                     | 81.89 (-)     | 81.89 (-)     | 0.00 (-)      |
| $\rho/\text{g}\cdot\text{cm}^{-3}$ | 1.56 (1.70)   | 1.61 (1.73)   | 3.21 (1.76)   |

26

27 **Table S2** Experiment and computed bond lengths of DNAN and TNT. The data  
 28 outside and in the parenthesis are for DNAN and TNT, respectively.

| Bond/Å              | Exp         | Reaxff-lg   | DFT         |
|---------------------|-------------|-------------|-------------|
| C-N                 | 1.47 (1.41) | 1.52 (1.52) | 1.48 (1.49) |
| C-C                 | 1.38 (1.39) | 1.36 (1.43) | 1.39 (1.39) |
| C-C <sub>CH3</sub>  | - (1.50)    | - (1.53)    | - (1.51)    |
| C-O                 | 1.39 (-)    | 1.44 (-)    | 1.38 (-)    |
| N-O                 | 1.20 (1.23) | 1.28 (1.28) | 1.22 (1.22) |
| C <sub>ph</sub> -H  | 1.09 (0.97) | 1.13 (1.13) | 1.08 (1.08) |
| C <sub>CH3</sub> -H | 1.09 (0.99) | 1.12 (1.12) | 1.09 (1.09) |

29

## 30 2. Detonation of DNAN and TNT during fast heating

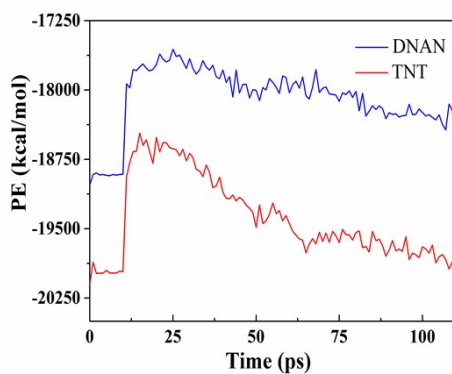

31

32 **Fig. S1** The potential energy (PE) evolution of DNAN (blue) and TNT (red) crystals

33

upon fast heating from 300 to 2500 K in 2 ps.

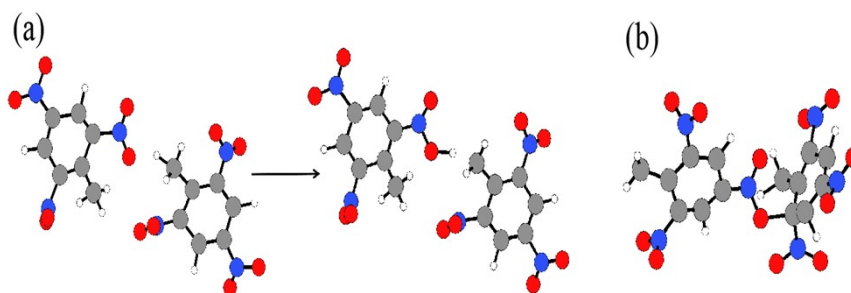

34

35 **Fig. S2** Snapshots of bimolecular H (a) and O (b) transfer of TNT in condensed

36

phase. The C, H, O, and N atoms are colored in gray, white, red and blue,

37

respectively.

38

## 39 3. Detonation of DNAN during slow heating

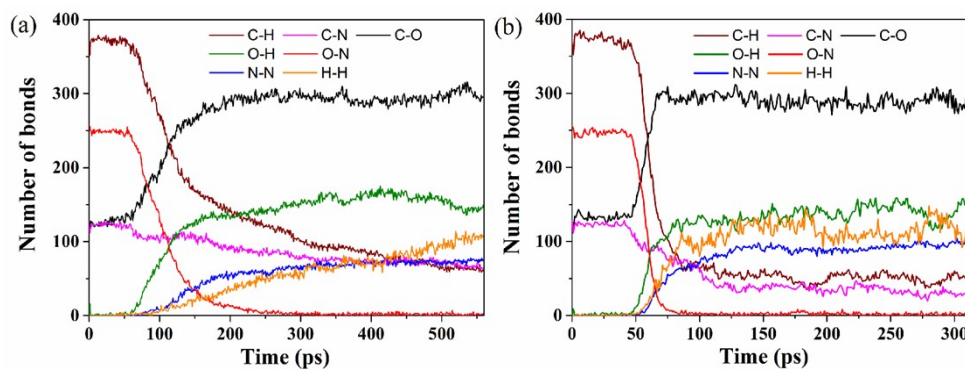

40

41 **Fig. S3** The evolution of the numbers of direct bonding between C, H, O and N atoms  
42 during the decomposition of DNAN in condensed phase at 2500 K (a) and 3500 K (b).  
43

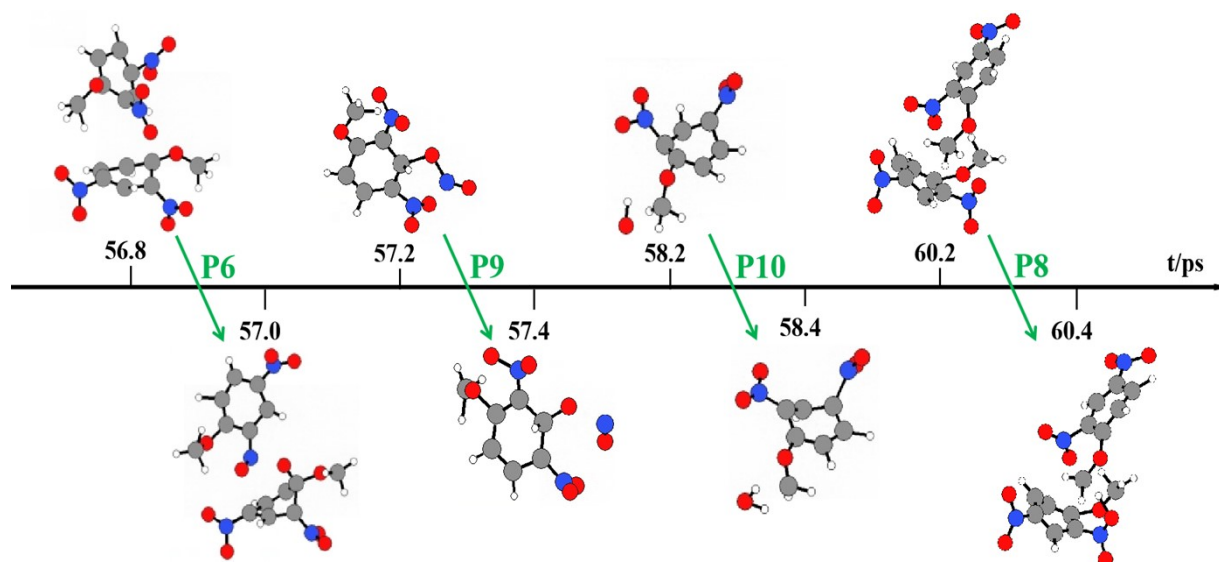

44  
45 **Fig. S4** The snapshots and initial time for the four types of bimolecular reactions  
46 during the initial decomposition of DNAN in condensed phase at 2500K. P6 and P8  
47 are the A+A type oxygen transfers, P9 is the A+B type oxygen transfer, while P10 is  
48 the A+B type hydrogen transfer (see Table 2 in the text). The C, H, O, and N atoms  
49 are colored in gray, white, red and blue, respectively.

50

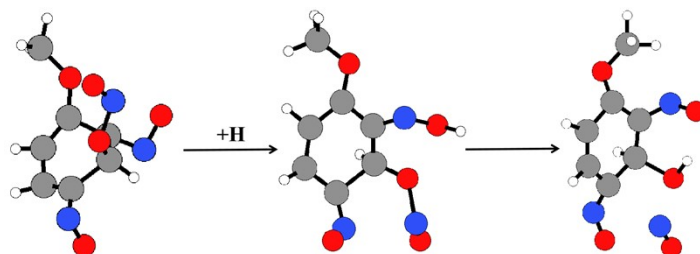

51

52 **Fig. S5** The formation of NO from a nucleophilic attack at the phenyl ring by NO<sub>2</sub>  
53 during the initial decomposition of the DNAN crystal at 2500 K. The C, H, O, and N  
54 atoms are colored in gray, white, red and blue, respectively.

55

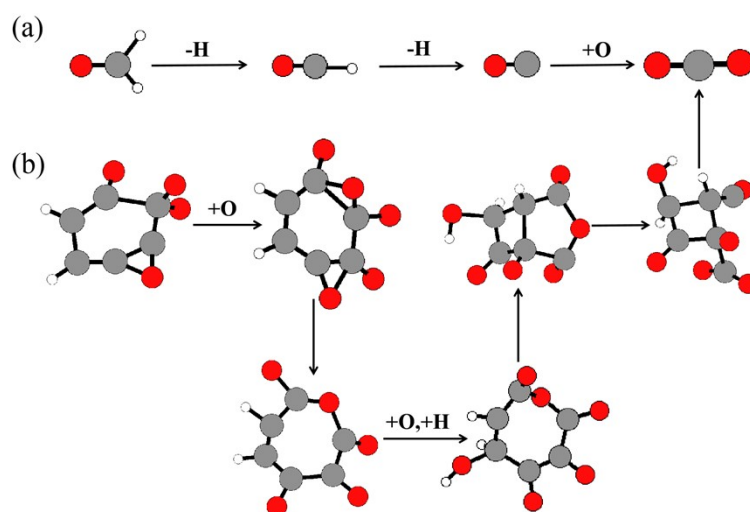

56

57 **Fig. S6** The formation of CO2 from CH2O (a) and carbon cluster (B) during the  
58 intermediate decomposition stage of the DNAN crystal at 2500 K. The C, H, and O  
59 atoms are colored in gray, white, red and blue, respectively.

60

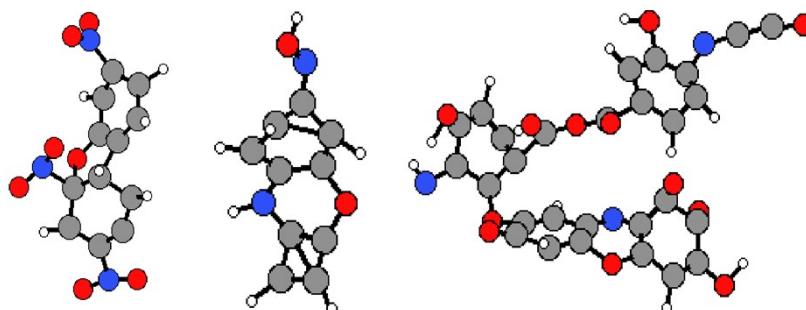

61

62 **Fig. S7** Three carbon clusters formed during the intermediate decomposition stage of  
63 the DNAN crystal at 2500 K. The C, H, O, and N atoms are colored in gray,  
64 red and blue, respectively.

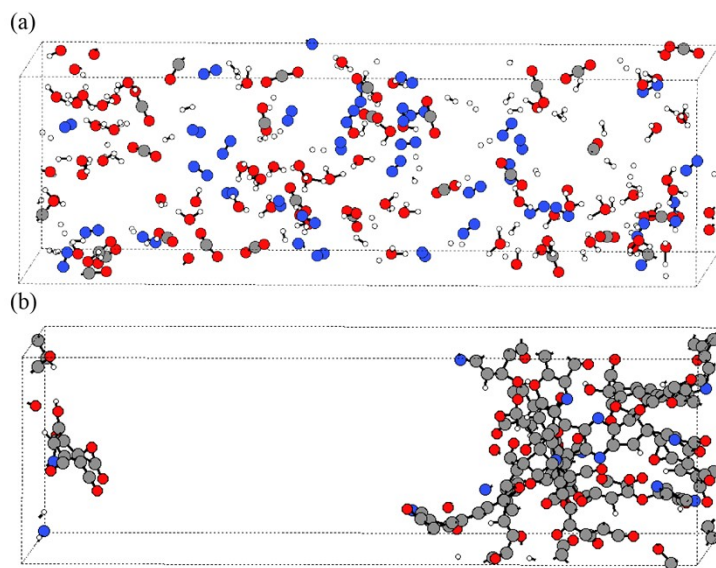

65

66 **Fig. S8** The final gas products (a) and carbon clusters (b) formed from the thermal

67 decomposition of the DNAN crystal at 2500 K. The C, H, O, and N atoms are colored

68 in gray, white, red and blue, respectively.

69

70

71

72

73

74

75

76

77

78

79

80

81 **4. Key reactions of DNAN and TNT during thermal decomposition**  
82 **and detonation**

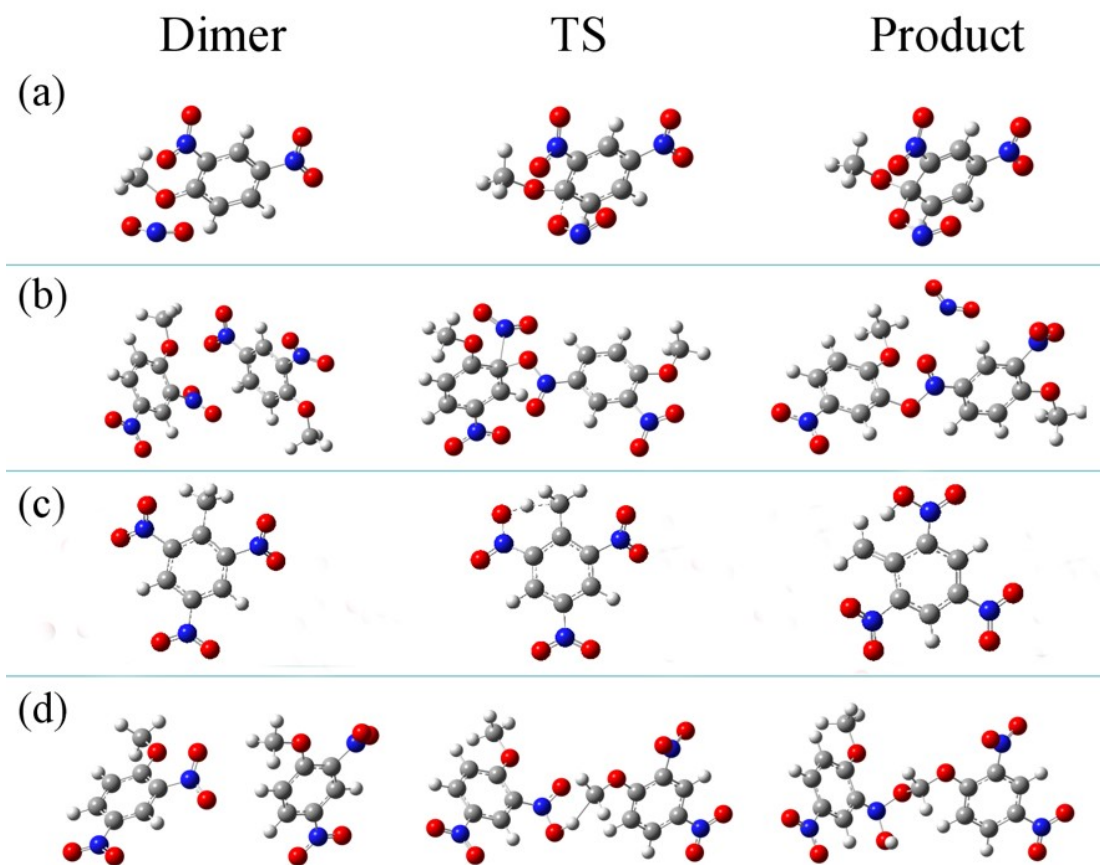

83

84 **Fig. S9** The structures of the reactant dimer, transition state and product of the  
85 reactions in Fig. 11 (b) of the text: (a) NO<sub>2</sub>-O transfer, (b) DNAN-O transfer, (c)  
86 TNT- $\alpha$ -H transfer, (d) DNAN-H transfer. The C, H, O, and N atoms are colored in  
87 gray, white, red and blue, respectively.
